# Supplementary material for: Nanocrystalline potassium impregnated SiO2 as heterogeneous catalysts for the transesterification of karanja and jatropha oil
Source: Royal Society of Chemistry journal article supplement (doi:10.1039/c5ra01446h), 2015-01-01
Supplement: c5ra01446h1.pdf [file c5ra01446h1.pdf]

## Supporting information

### Nanocrystalline potassium impregnated SiO<sub>2</sub> as heterogeneous catalysts for the transesterification of karanja and jatropha oil

Vishal Mutreja<sup>a</sup>, Satnam Singh<sup>b\*</sup>, Tajbir Kaur Minhas<sup>b</sup> and Amjad Ali<sup>b</sup>

<sup>a</sup> Department of Chemistry, Maharishi Markandeshwar University, Mullana, India

<sup>b</sup> School of Chemistry and Biochemistry, Thapar University, Patiala-147004 (India)

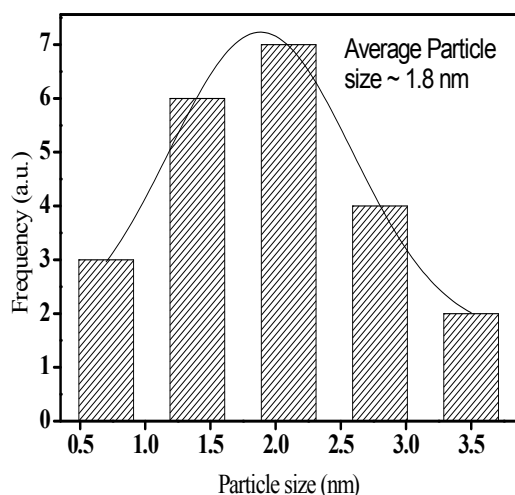

**S.I.-Fig. 1** Histogram for the diameters of impregnated species in Si: K-2.

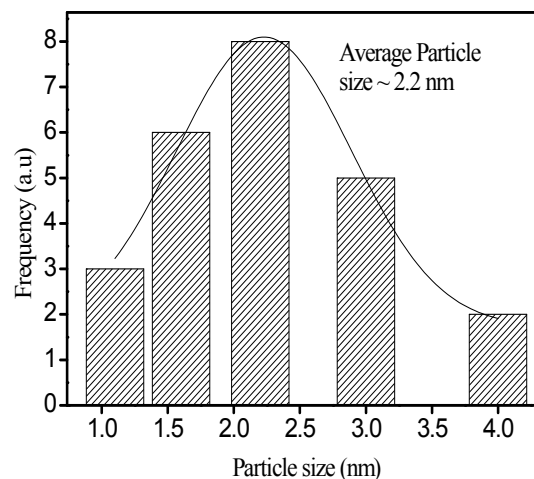

**S.I.- Fig. 2** Histogram for the diameters of impregnated species in Si: K-4.

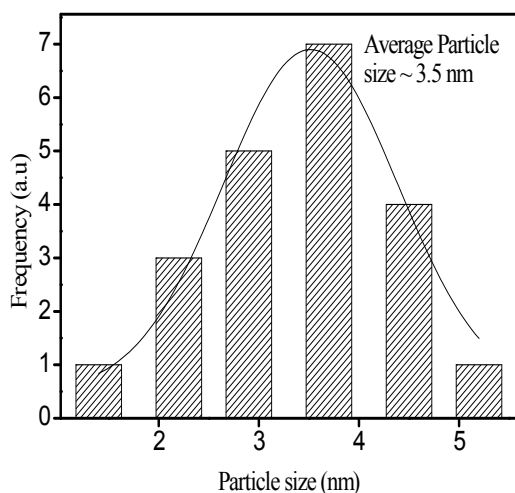

**S.I.-Fig. 3** Histogram for the diameters of impregnated species in Si: K-6.

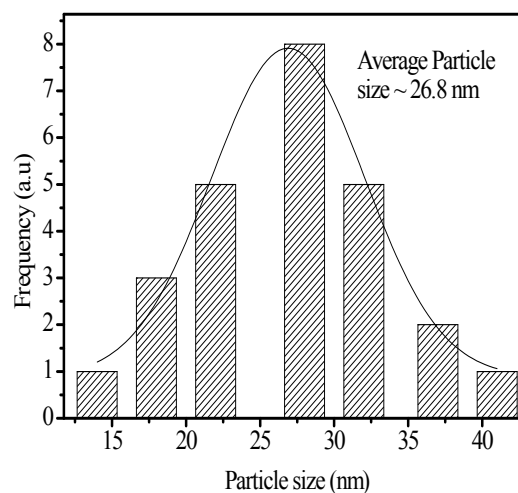

**S.I.- Fig. 4** Histogram for the particle size distribution of SiO<sub>2</sub> in Si: K-2

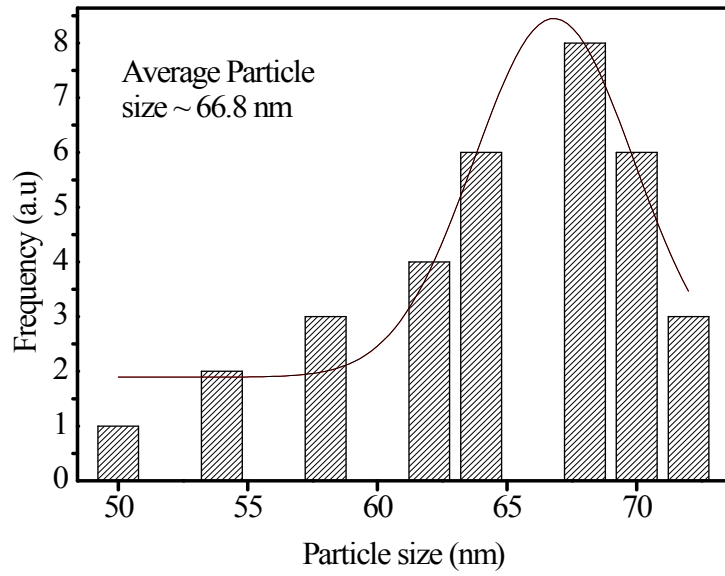

S.I.- Fig. 5 Histogram for the particle size distribution of SiO<sub>2</sub> in Si: K-6

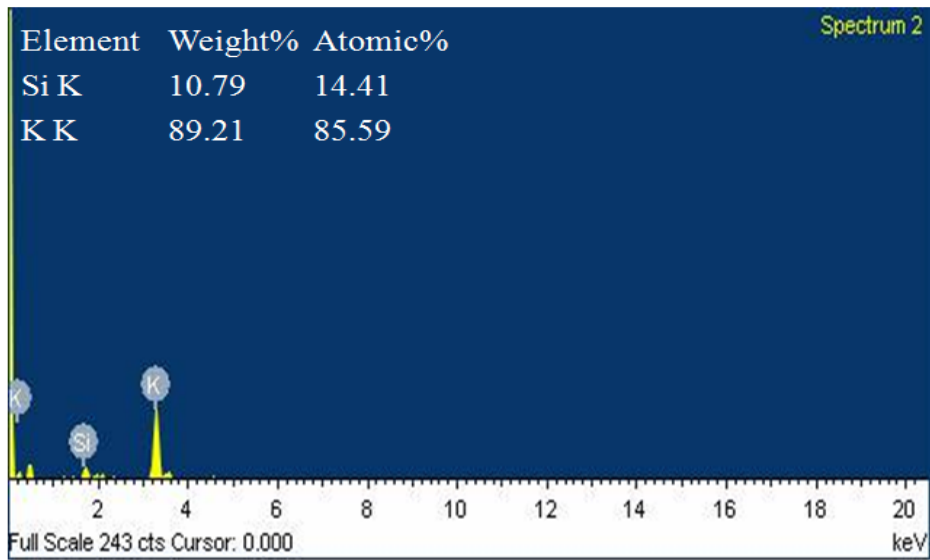

S.I.-Fig. 6. SEM-EDX measurement of Si: K-6.

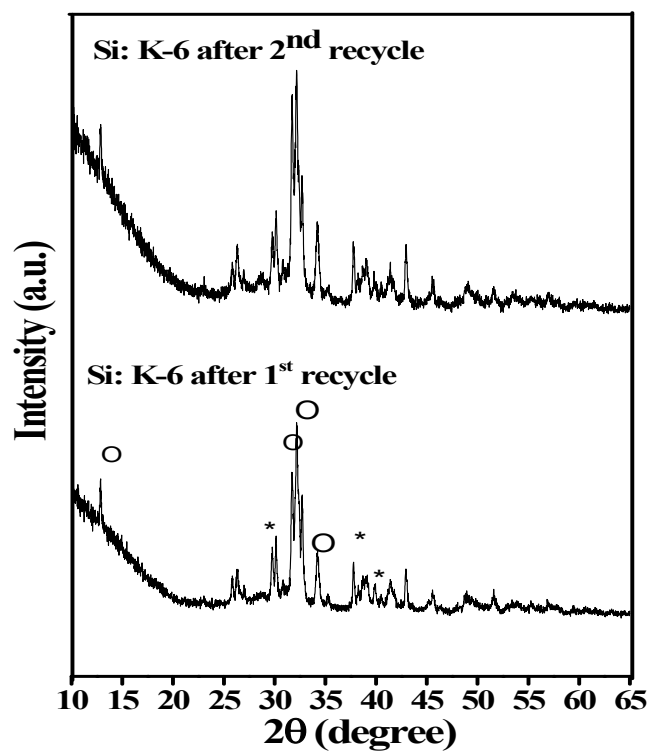

S.I.-Fig. 7. Powder XRD pattern of reused Si: K-X-6 catalysts (\*,  $K_2Si_2O_5$ ; O,  $K_6Si_3O_9$ ).
